# Supplementary material
Source: Springer Nature journal article supplement (https://www.springermedizin.de/resource/supplementary/12958_2012_1035_MOESM13_ESM.pdf/9566656)
Supplement: MOESM13 [file 9566656]

**A** Indifferent gonad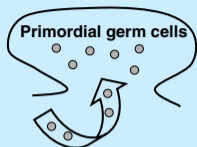**B** Embryonic oocytes  
(direct influence of rete ovarii)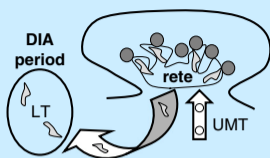**C** Fetal oocytes  
(hormonal signaling + OCMT)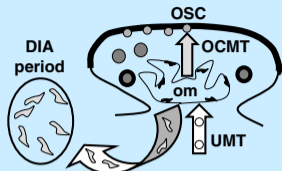**D** Perinatal phase & childhood  
(OCMT signaling only)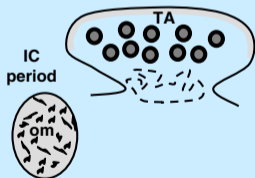**E** Adult ovary  
(hormonal signaling + OCMT)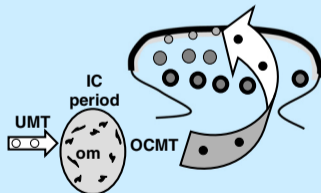**F** Aging ovary  
(hormonal signaling only)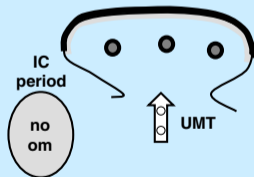

○ = germ cells

● = oocytes

● = primary follicles

 = "veiled" MDC  
(memory builders)

 = memory keepers

○ = uncommitted MDC &amp; T Cells (UMT)

● = ovary-committed MDC &amp; T cells (OCMT)
